# Supplementary material for: Preparation and Investigation of High Surface Area Aerogels from Crosslinked Polypropylenes
Source: MDPI journal article supplement (doi:10.3390/polym16101382), 2024-05-12
Supplement: s1 [file s1]

# Preparation and Investigation of Aerogels from Crosslinked Polypropylenes

Radek Coufal,<sup>a,b\*</sup> Mateusz Fijalkowski,<sup>b</sup> Kinga Adach,<sup>b</sup> Huaitian Bu,<sup>c</sup> Christian W. Karl,<sup>c</sup> Eliška Mikysková<sup>d</sup> and Stanislav Petřík<sup>b</sup>

<sup>a</sup>*Department of Science and Research, Faculty of Health Studies, Technical University of Liberec, 461 17 Liberec, Czech Republic*

<sup>b</sup>*Department of Advanced Materials, Institute for Nanomaterials, Advanced Technologies and Innovation (CXI), Technical University of Liberec, 461 17 Liberec, Czech Republic*

<sup>c</sup>*Department of Materials and Nanotechnology, SINTEF Industry, Forskningsveien 1, 0373 Oslo, Norway*

<sup>d</sup>*Center for Innovations in the Field of Nanomaterials and Nanotechnologies, J. Heyrovsky Institute of Physical Chemistry, Academy of Sciences of the Czech Republic, Dolejskova 3, Prague 18223, Czech Republic*

radek.coufal@tul.cz

## Supporting Information

### TABLE OF CONTENTS

|                 |   |
|-----------------|---|
| IR spectra      | 2 |
| BET results     | 3 |
| SEM micrographs | 6 |

## IR spectra

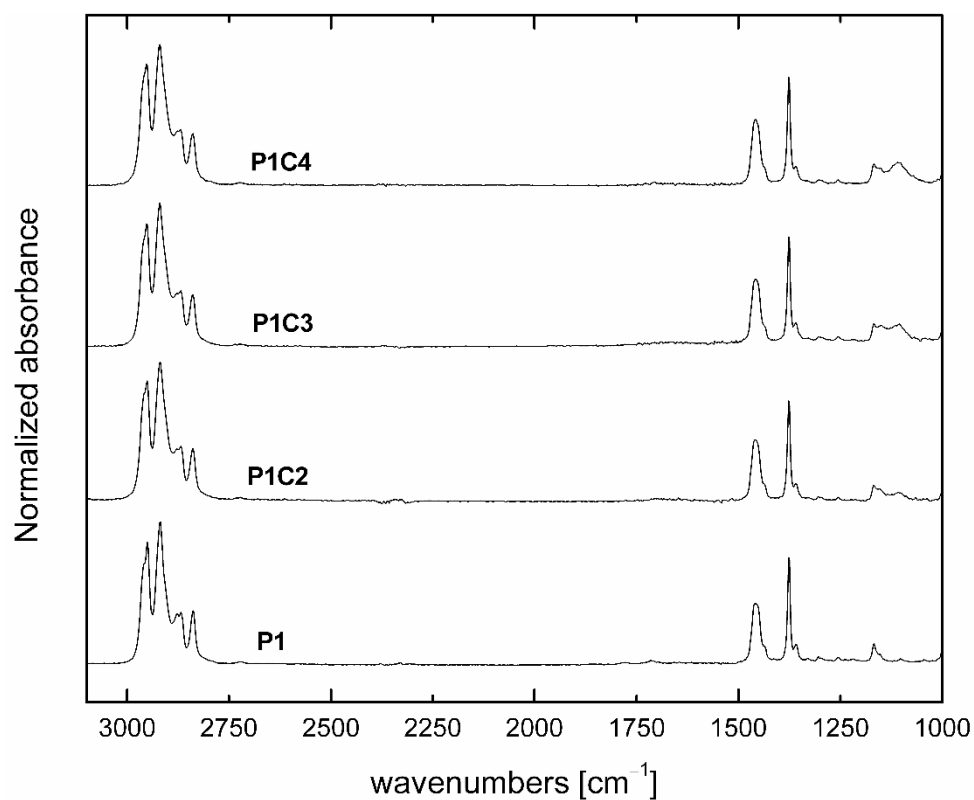

**Figure S1** FTIR spectra of the crosslinked polymer **P1**.

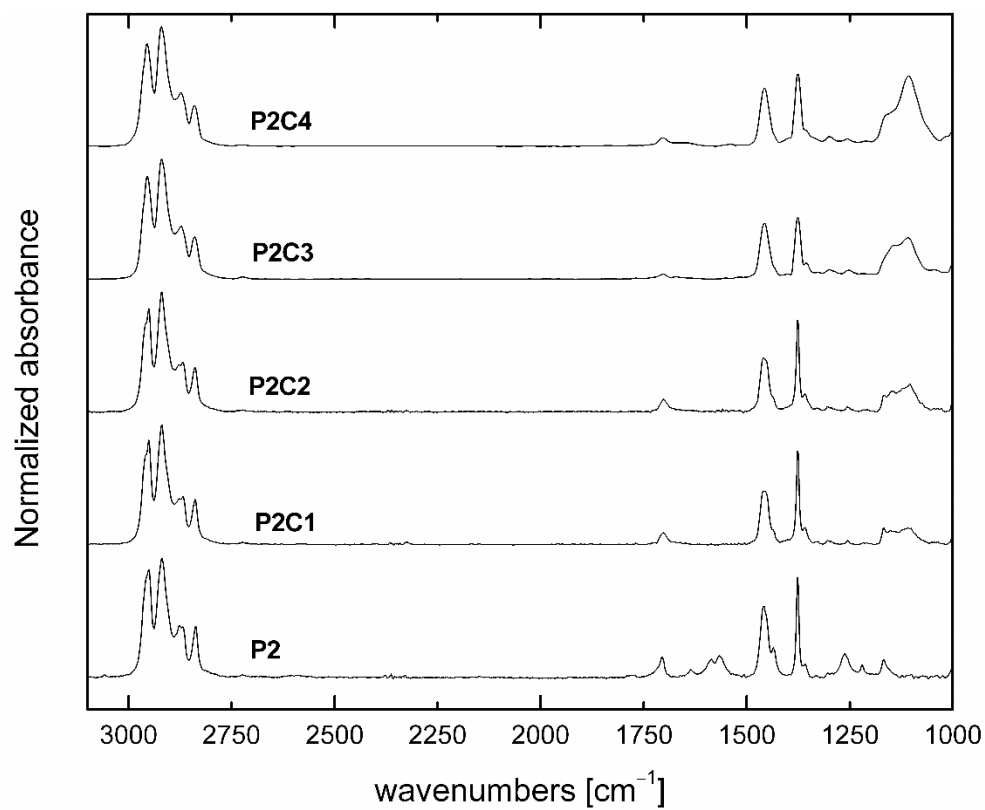

**Figure S2** FTIR spectra of the crosslinked polymer **P2**.

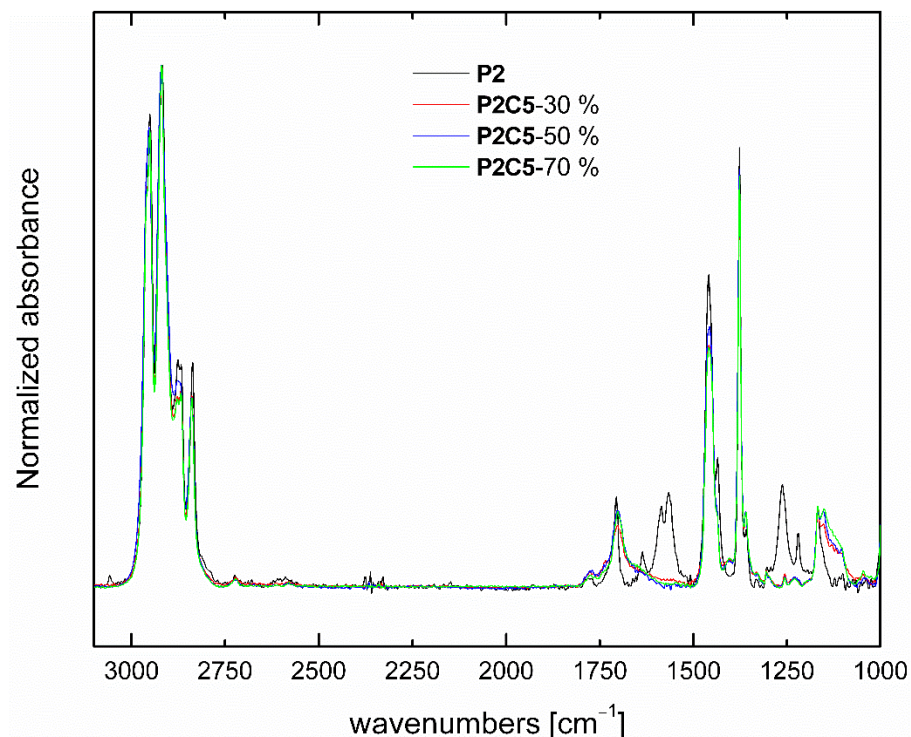

**Figure S3** FTIR spectra of the crosslinked polymer **P2** with the crosslinker **C5** in different molar ratio of MA:NH<sub>2</sub>.

### BET results

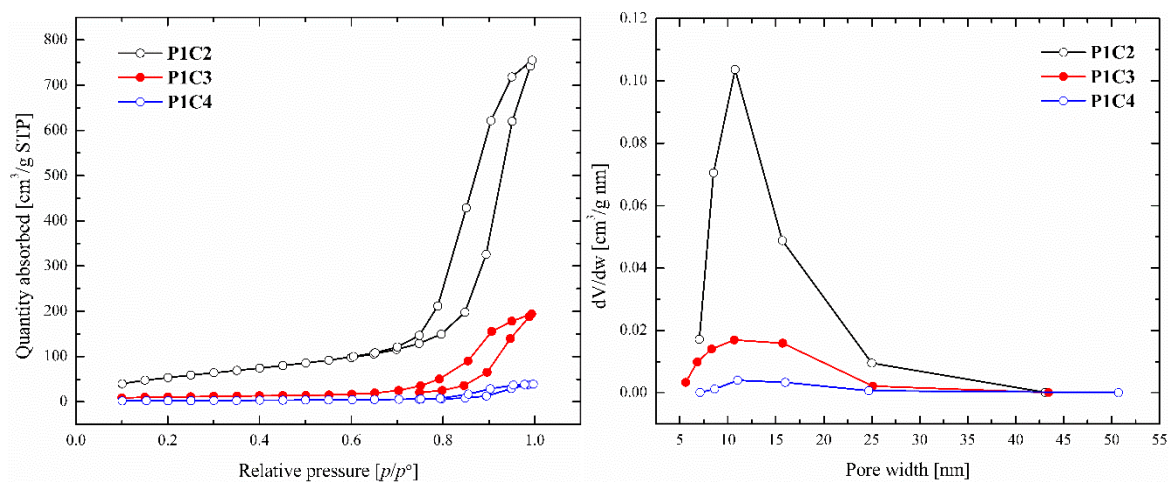

**Figure S4** N<sub>2</sub> adsorption-desorption isotherms of aerogels from the polymer **P1** (left) and their pore-size distribution profiles (right).

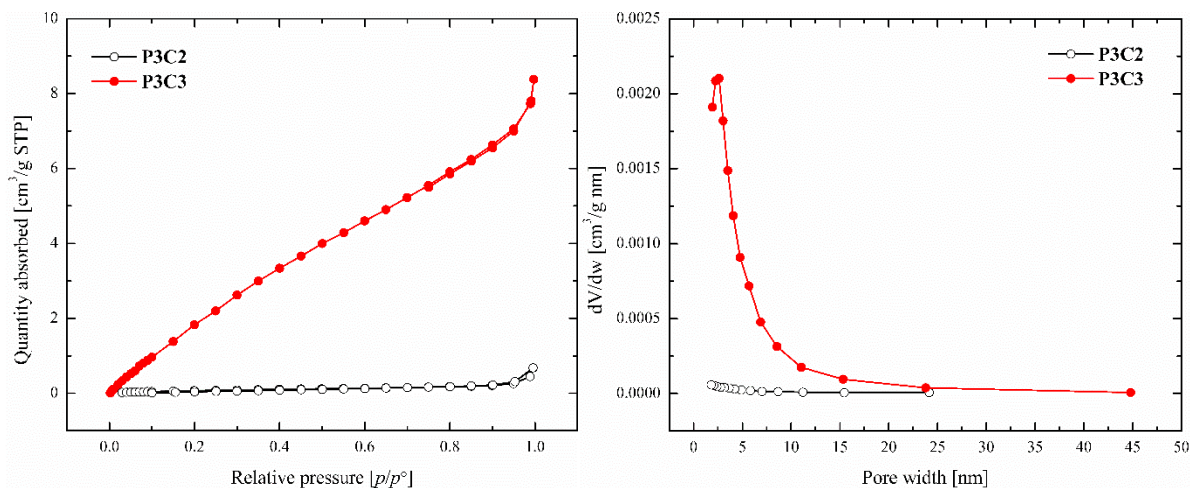

**Figure S5**  $N_2$  adsorption-desorption isotherms of aerogels from the polymer **P3** (left) and their pore-size distribution profiles (right).

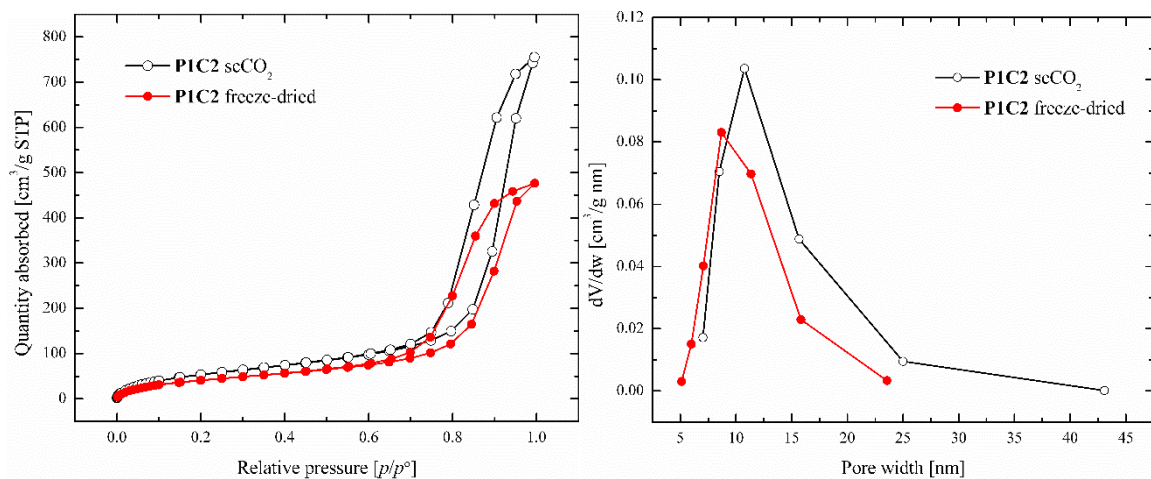

**Figure S6**  $N_2$  adsorption-desorption isotherms of **P1C2** aerogels obtained by scCO<sub>2</sub> and freeze-drying (left) and their pore-size distribution profiles (right).

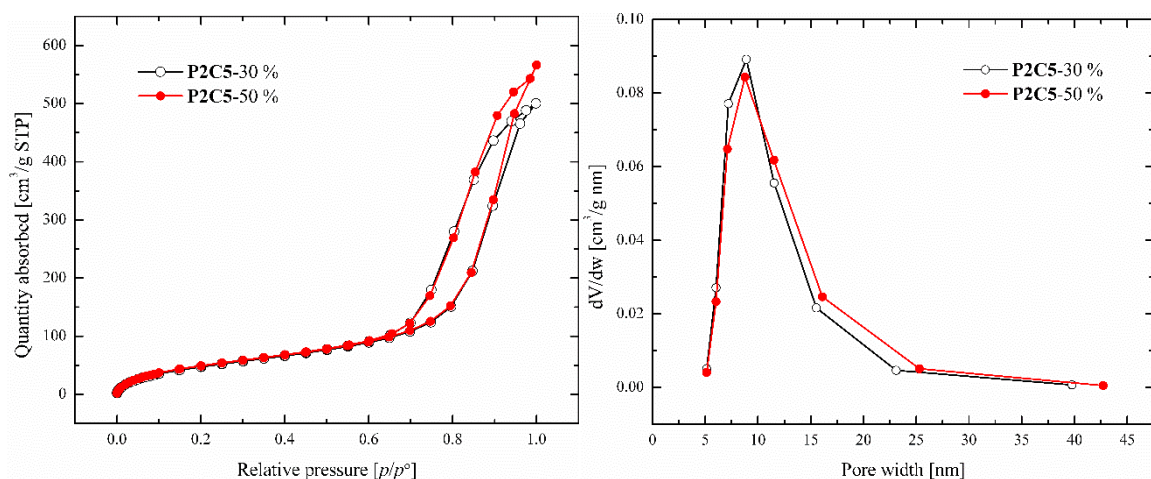

**Figure S7**  $N_2$  adsorption-desorption isotherms of **P2C5** aerogels using different molar ratio of MA:NH<sub>2</sub> in polymer synthesis (left) and their pore-size distribution profiles (right).

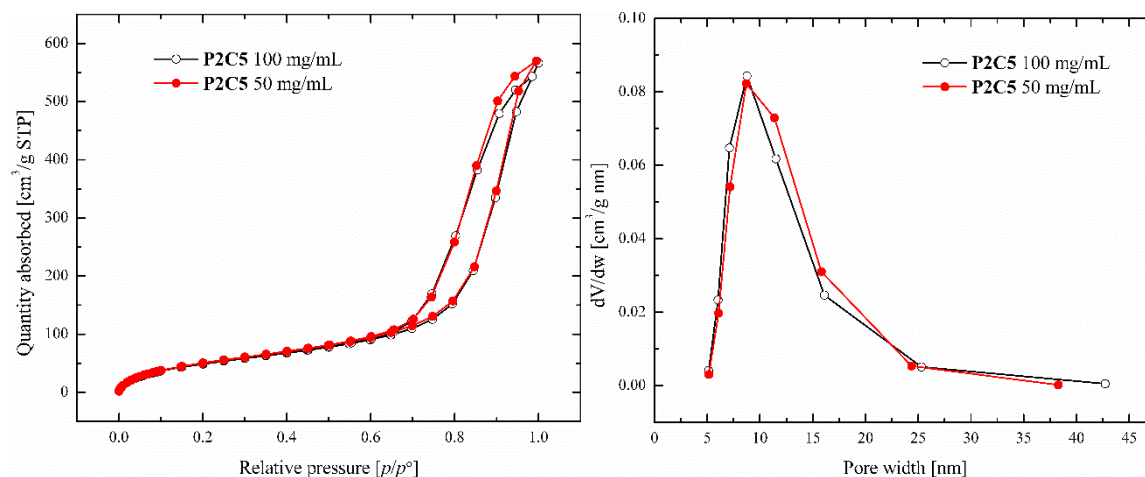

**Figure S8**  $N_2$  adsorption-desorption isotherms of **P2C5** aerogels (50% molar ratio of MA: $NH_2$ ) using different polymer concentration in gel preparations (left) and their pore-size distribution profiles (right).

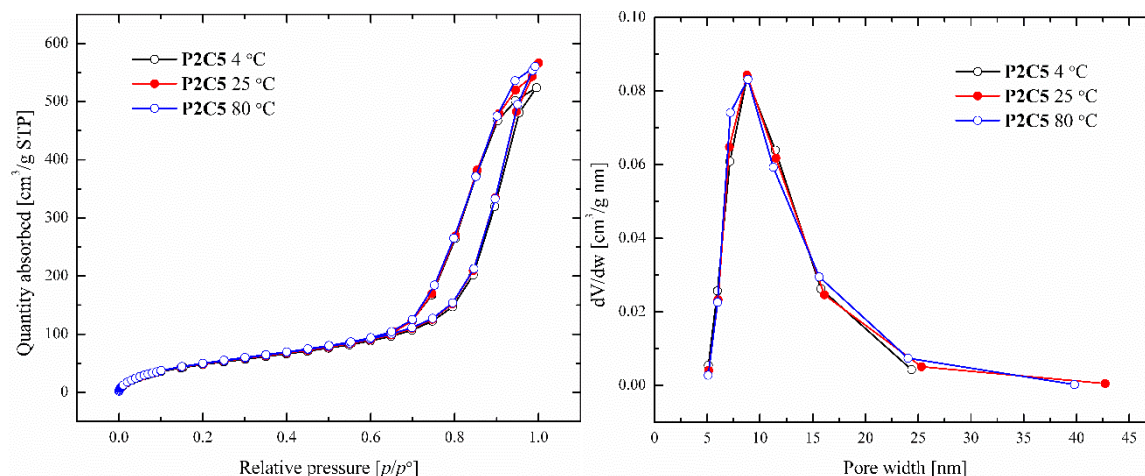

**Figure S9**  $N_2$  adsorption-desorption isotherms of **P2C5** aerogels obtained by using different quenching temperature in gel preparations (left) and their pore-size distribution profiles (right).

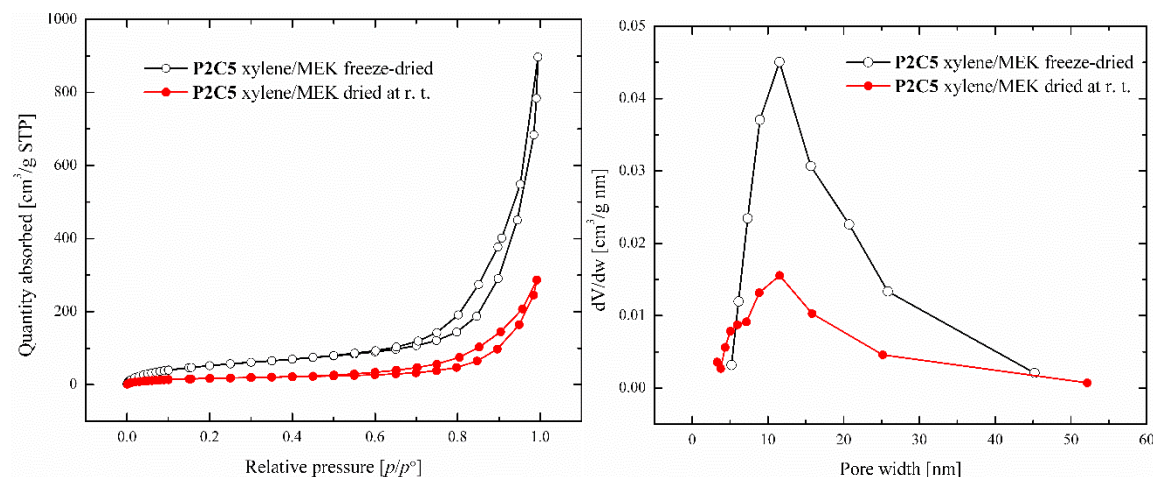

**Figure S10**  $N_2$  adsorption-desorption isotherms of **P2C5** aerogels obtained by freeze-drying and drying at r. t. of xylene/MEK gels (left) and their pore-size distribution profiles (right).



## SEM micrographs

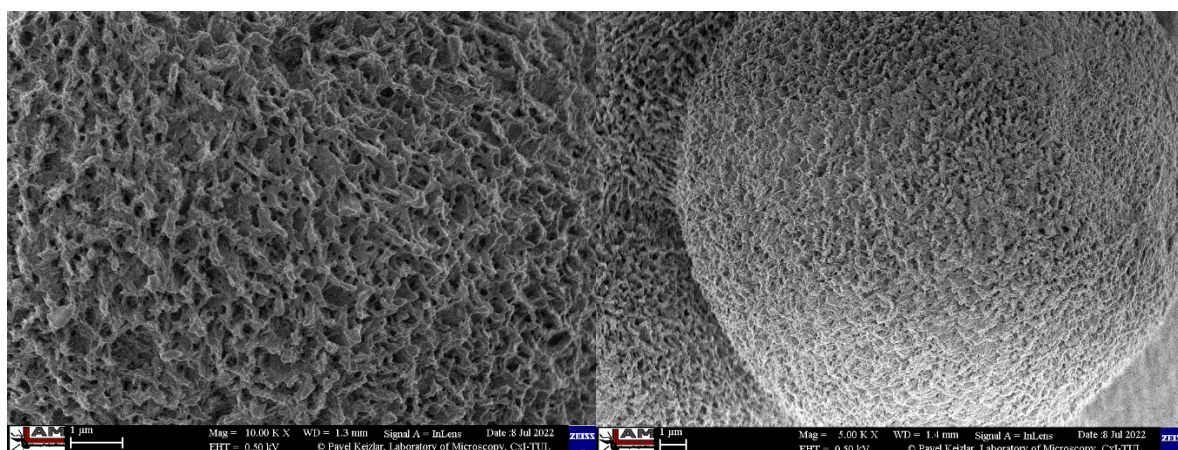

Figure S11 SEM micrographs of **P1C3** aerogel.

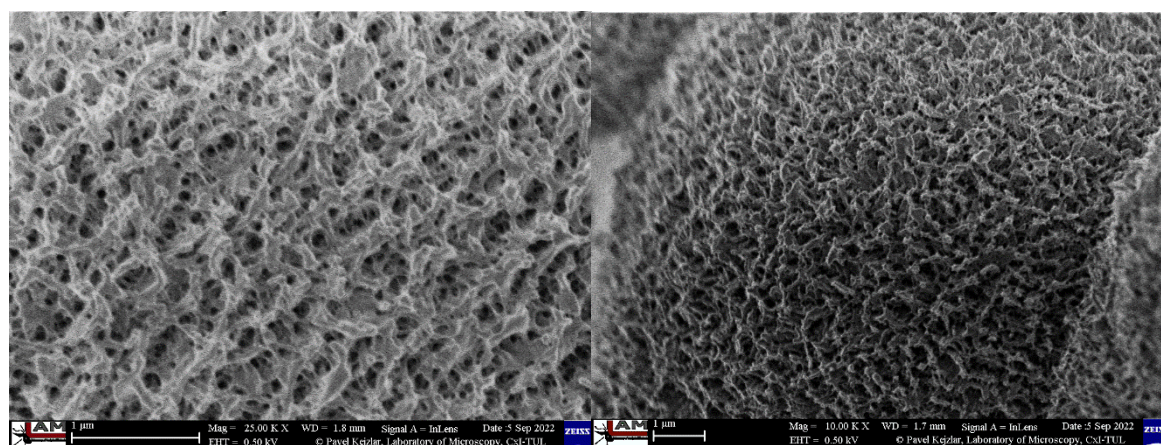

Figure S12 SEM micrographs of **P1C4** aerogel.

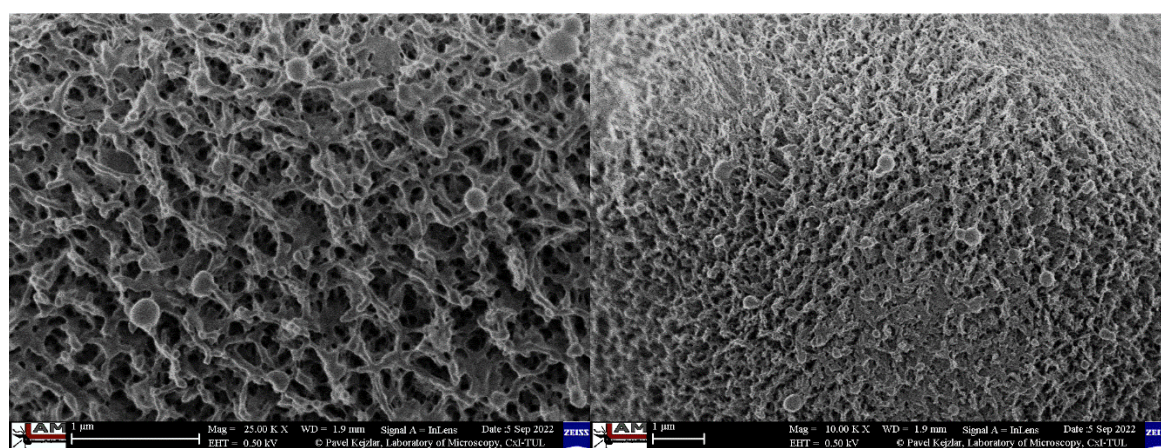

Figure S13 SEM micrographs of **P2C1** aerogel.



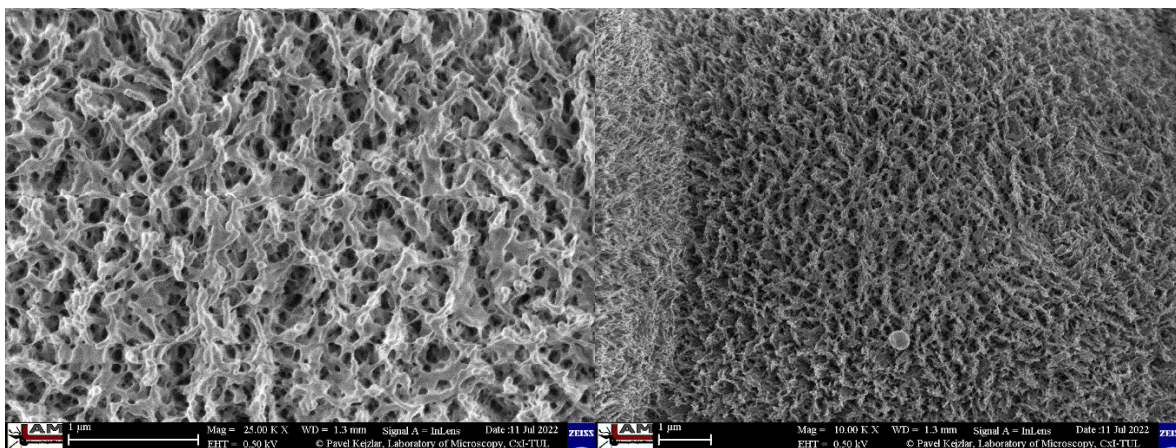

**Figure S14** SEM micrographs of **P2C3** aerogel.

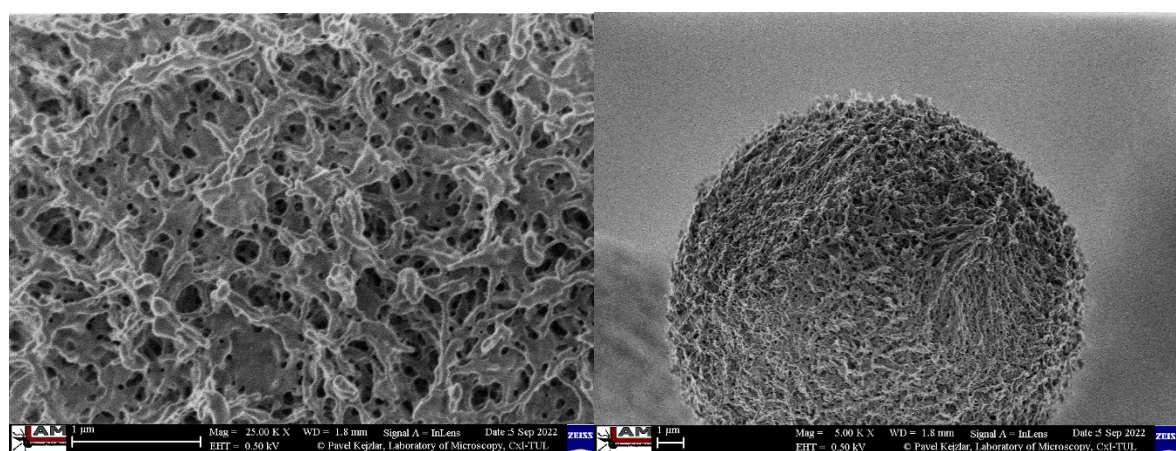

**Figure S15** SEM micrographs of **P2C4** aerogel.

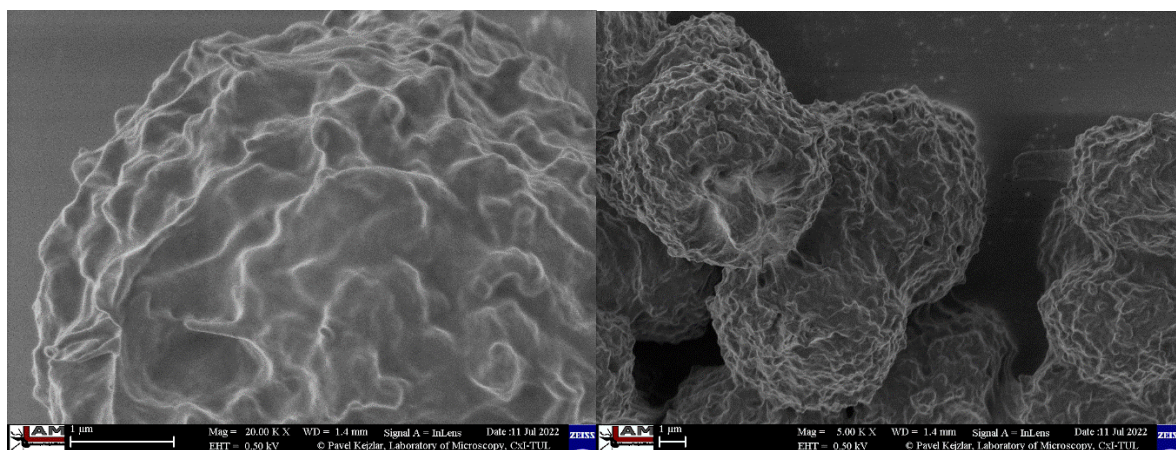

**Figure S16** SEM micrographs of **P3C3** aerogel.



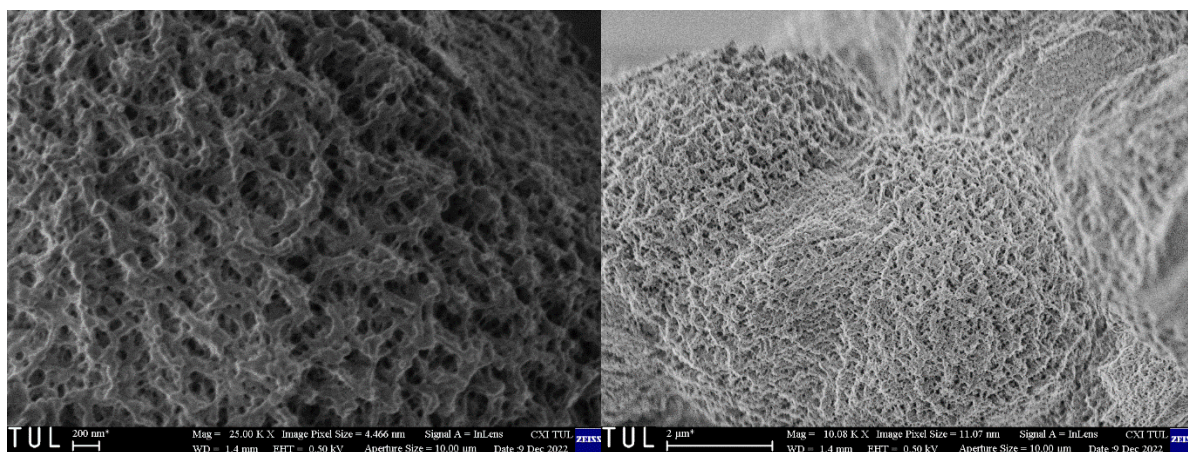

**Figure S17** SEM micrographs of **P2C5** aerogel, 30% molar ratio of MA:NH<sub>2</sub>, quenching temperature 25 °C.

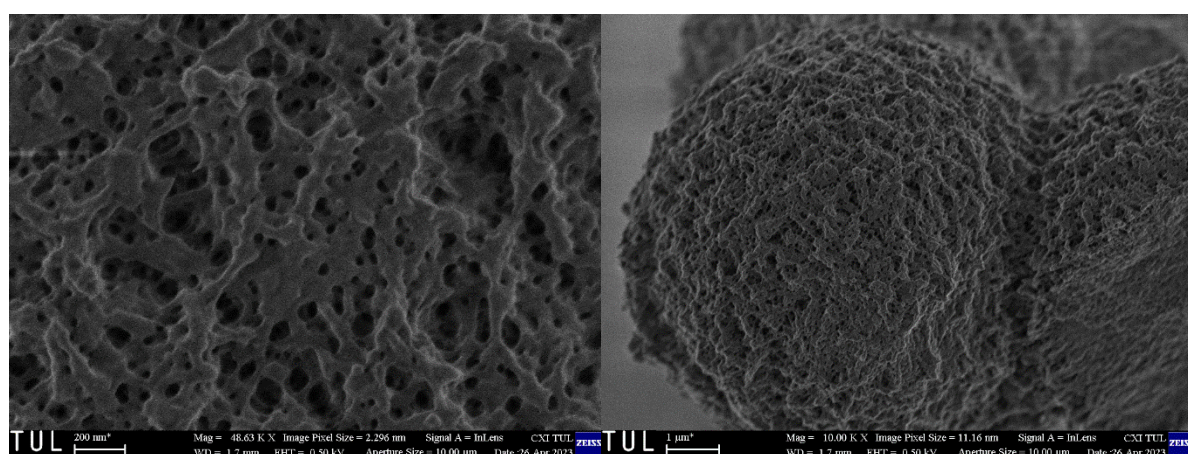

**Figure S18** SEM micrographs of **P2C5** aerogel, 50% molar ration of MA:NH<sub>2</sub>, quenching temperature 4 °C.

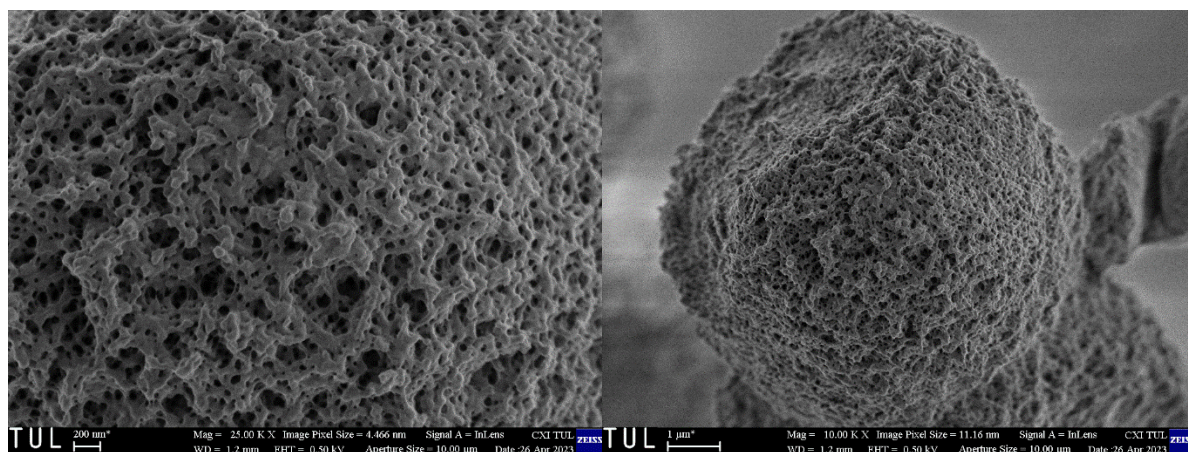

**Figure S19** SEM micrographs of **P2C5** aerogel, 50% molar ration of MA:NH<sub>2</sub>, quenching temperature 80 °C.



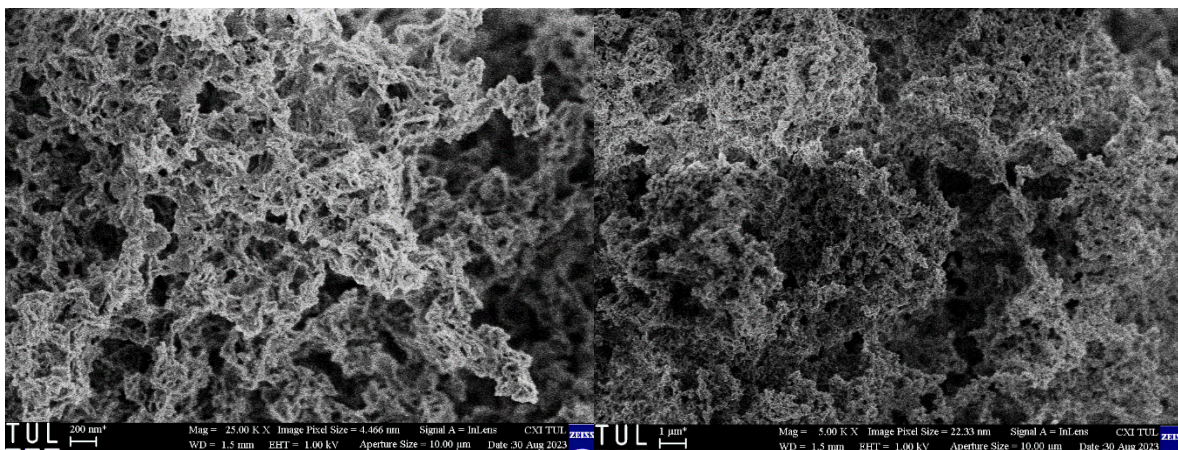

**Figure S20** SEM micrographs of **P2C5** aerogel, 50% molar ration of MA:NH<sub>2</sub>, using xylene/MEK (4/6, v/v) in gel preparation, dried at r. t.

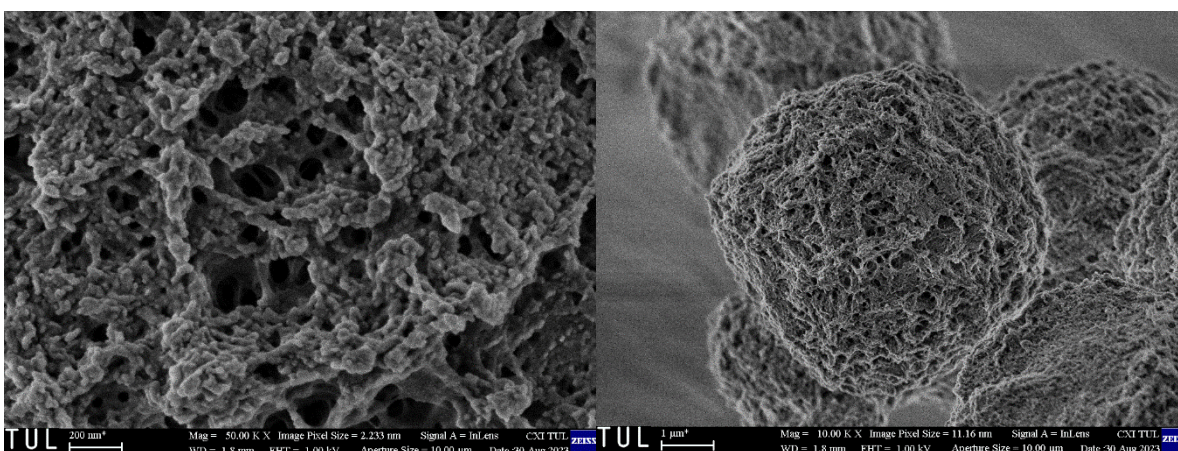

**Figure S21** SEM micrographs of **P2C5** aerogel, 50% molar ration of MA:NH<sub>2</sub>, using concentration of 50 mg/mL in gel preparation.
